# Supplementary material for: Easy and fast prediction of green solvents for small molecule donor-based organic solar cells through machine learning
Source: Royal Society of Chemistry journal article supplement (doi:10.1039/d3cp00177f), 2023-01-01
Supplement: d3cp00177f1.pdf [file d3cp00177f1.pdf]

## Supporting Information

### Easy and fast prediction of the green solvents for small molecule donor-based organic solar cells through machine learning

Asif Mahmood,<sup>a</sup> Y. Sandali<sup>b</sup> and Jin-Liang Wang<sup>\*a</sup>

<sup>a</sup>Key Laboratory of Cluster Science of Ministry of Education, Beijing Key Laboratory of Photoelectronic/Electrophotonic Conversion Materials, School of Chemistry and Chemical Engineering, Beijing Institute of Technology, Beijing 100081, China, E-mail: jinliwang@bit.edu.cn.

<sup>b</sup>Physics Department, College of Science, University of Jeddah, Jeddah 23890, Saudi Arabia.

**Table S1.** Data set used for machine learning

| No | Solvent                  | $\delta_D$ | $\delta_P$ | $\delta_H$ | smiles                 | Ref |
|----|--------------------------|------------|------------|------------|------------------------|-----|
| 1  | 1,1,1-Trichloroethane    | 16.8       | 4.3        | 2          | CC(Cl)(Cl)Cl           | 1   |
| 2  | 1,3-Butanediol           | 16.6       | 10         | 21.5       | CC(O)CCO               | 1   |
| 3  | 1,4-Butandiol Diacrylate | 16.8       | 9.1        | 4.2        | C=CC(=O)OCCCCOC(=O)C=C | 1   |
| 4  | 1,4-Dioxane              | 19         | 1.8        | 7.4        | C1COCCO1               | 1   |
| 5  | 1-Bromonaphthalene       | 20.3       | 3.1        | 4.1        | Br1cccc2ccccc12        | 1   |
| 6  | 1-Butanol                | 16         | 5.7        | 15.8       | CCCCO                  | 1   |
| 7  | 1-Chlorobutane           | 16.2       | 5.5        | 2          | CCCCCl                 | 1   |
| 8  | 1-Pentanol               | 15.9       | 5.9        | 13.9       | CCCCCO                 | 1   |
| 9  | 1-Propanol               | 16         | 6.8        | 17.4       | CCCO                   | 1   |
| 10 | 2-Butanol                | 15.8       | 5.7        | 14.5       | CCC(C)O                | 1   |
| 11 | 2-Ethyl Hexyl Acetate    | 15.8       | 2.9        | 5.1        | CCCCCC(CC)COC(C)=O     | 1   |
| 12 | 2-Ethyl Hexyl Acrylate   | 14.8       | 4.7        | 3.4        | C=CC(=O)OCC(CC)CCCC    | 1   |
| 13 | 2-Ethyl-1-Butanol        | 15.8       | 4.3        | 13.5       | CCC(CC)CO              | 1   |
| 14 | 2-Ethyl-Hexanol          | 15.9       | 3.3        | 11.8       | CCCCCC(CC)CO           | 1   |
| 15 | 2-Nitropropane           | 16.2       | 12.1       | 4.1        | CC(C)[N+](=O)[O-]      | 1   |
| 16 | 2-Propanol               | 15.8       | 6.1        | 16.4       | CC(C)O                 | 1   |
| 17 | 2-Pyrrolidone            | 19.4       | 17.4       | 11.3       | O=C1CCCN1              | 1   |
| 18 | 3-Chloro-1-Propanol      | 17.5       | 5.7        | 14.7       | OCCCl                  | 1   |
| 19 | Acetic Acid              | 14.5       | 8          | 13.5       | CC(=O)O                | 1   |
| 20 | Acetic Anhydride         | 16         | 11.7       | 10.2       | CC(=O)OC(C)=O          | 1   |
| 21 | Acetone                  | 15.5       | 10.4       | 7          | CC(C)=O                | 1   |
| 22 | Acetonitrile             | 15.3       | 18         | 6.1        | CC#N                   | 1   |
| 23 | Acetophenone             | 19.6       | 8.6        | 3.7        | CC(=O)c1ccccc1         | 1   |
| 24 | Acetylacetone            | 17.1       | 9          | 4.1        | CC(=O)CC(C)=O          | 1   |
| 25 | Acrylic Acid             | 17.7       | 6.4        | 14.9       | C=CC(=O)O              | 1   |
| 26 | Acrylonitrile            | 16         | 12.8       | 6.8        | C=CC#N                 | 1   |
| 27 | Aniline                  | 19.4       | 5.1        | 10.2       | Nc1ccccc1              | 1   |
| 28 | Anisole                  | 17.8       | 4.1        | 6.7        | COc1ccccc1             | 1   |
| 29 | Benzaldehyde             | 19.4       | 7.4        | 5.3        | O=Cc1ccccc1            | 1   |
| 30 | Benzene                  | 18.4       | 0          | 2          | c1ccccc1               | 1   |

|    |                                           |      |      |      |                                              |   |
|----|-------------------------------------------|------|------|------|----------------------------------------------|---|
| 31 | Benzyl Alcohol                            | 18.4 | 6.3  | 13.7 | OCc1ccccc1                                   | 1 |
| 32 | Benzyl Butyl Phthalate                    | 19   | 11.2 | 3.1  | CCCCOC(=O)c1ccccc1C(=O)OCc1ccccc1            | 1 |
| 33 | Benzyl Methacrylate                       | 16.8 | 4.1  | 4.1  | C=C(C)C(=O)OCc1ccccc1                        | 1 |
| 34 | Butoxy Ethoxy Propanol                    | 15.5 | 6.5  | 10.2 | CCCCOCC(O)COCC                               | 1 |
| 35 | Butyl Lactate                             | 15.8 | 6.5  | 10.2 | CCCCOC(=O)C(C)O                              | 1 |
| 36 | Butyric Acid                              | 14.9 | 4.1  | 10.6 | CCCC(=O)O                                    | 1 |
| 37 | Butyronitrile                             | 15.3 | 12.4 | 5.1  | CCCC#N                                       | 1 |
| 38 | Carbon Dioxide                            | 15.7 | 6.3  | 5.7  | O=C=O                                        | 1 |
| 39 | Carbon Disulfide                          | 20.5 | 0    | 0.6  | S=C=S                                        | 1 |
| 40 | Carbon Tetrachloride                      | 17.8 | 0    | 0.6  | ClC(Cl)(Cl)Cl                                | 1 |
| 41 | Chlorobenzene                             | 19   | 4.3  | 2    | Clc1ccccc1                                   | 1 |
| 42 | Chloroform                                | 17.8 | 3.1  | 5.7  | ClC(Cl)Cl                                    | 1 |
| 43 | Cyclohexane                               | 16.8 | 0    | 0.2  | C1CCCCC1                                     | 1 |
| 44 | Cyclohexanol                              | 17.4 | 4.1  | 13.5 | OC1CCCCC1                                    | 1 |
| 45 | Cyclohexanone                             | 17.8 | 6.3  | 5.1  | O=C1CCCCC1                                   | 1 |
| 46 | Cyclohexylamine                           | 17.2 | 3.1  | 6.5  | NC1CCCCC1                                    | 1 |
| 47 | Cyclohexylchloride                        | 17.3 | 5.5  | 2    | ClC1CCCCC1                                   | 1 |
| 48 | Di-(2-Chloroethyl) Ether                  | 18.8 | 9    | 5.7  | ClCCOCCCl                                    | 1 |
| 49 | Diacetone Alcohol                         | 15.8 | 8.2  | 10.8 | CC(=O)CC(C)(C)O                              | 1 |
| 50 | Dibutyl Phthalate                         | 17.8 | 8.6  | 4.1  | CCCCOC(=O)c1ccccc1C(=O)OCCCC                 | 1 |
| 51 | Diethyl Amine                             | 14.9 | 2.3  | 6.1  | CCNCC                                        | 1 |
| 52 | Diethyl Ether                             | 14.5 | 2.9  | 5.1  | CCOCC                                        | 1 |
| 53 | Diethyl Sulfide                           | 16.8 | 3.1  | 2    | CCSCC                                        | 1 |
| 54 | Diethylene Glycol                         | 16.6 | 12   | 20.7 | OCCOCCO                                      | 1 |
| 55 | Diethylene Glycol Butyl Ether Acetate     | 16   | 4.1  | 8.2  | CCCCOCCOCCOC(C)=O                            | 1 |
| 56 | Diethylene Glycol Methyl t-Butyl Ether    | 16   | 7.2  | 7.2  | COCCOCCOC(C)(C)C                             | 1 |
| 57 | Diethylene Glycol Monobutyl Ether         | 16   | 7    | 10.6 | CCCCOCCOCCO                                  | 1 |
| 58 | Diethylene Glycol Monoethyl Ether         | 16.1 | 9.2  | 12.2 | CCOCCOCCO                                    | 1 |
| 59 | Diethylene Glycol Monoethyl Ether Acetate | 16.2 | 5.1  | 9.2  | CCOCCOCCOC(C)=O                              | 1 |
| 60 | Diethylene Glycol Monomethyl Ether        | 16.2 | 7.8  | 12.6 | COCCOCCO                                     | 1 |
| 61 | Diethylenetriamine                        | 16.7 | 13.3 | 14.3 | NCCNCCN                                      | 1 |
| 62 | Di-Isobutyl Carbinol                      | 14.9 | 3.1  | 10.8 | CC(C)CC(O)CC(C)C                             | 1 |
| 63 | Di-Isobutyl Ketone                        | 16   | 3.7  | 4.1  | CC(C)CC(=O)CC(C)C                            | 1 |
| 64 | Dimethoxymethane                          | 15   | 1.8  | 8.6  | COCOC                                        | 1 |
| 65 | Dimethyl Ethanolamine                     | 16.1 | 9.2  | 15.3 | CN(C)CCO                                     | 1 |
| 66 | Dimethyl Formamide                        | 17.4 | 13.7 | 11.3 | CN(C)C=O                                     | 1 |
| 67 | Dimethyl Phthalate                        | 18.6 | 10.8 | 4.9  | COC(=O)c1ccccc1C(=O)OC                       | 1 |
| 68 | Dimethyl Sulfone                          | 19   | 19.4 | 12.3 | CS(C)(=O)=O                                  | 1 |
| 69 | Dimethyl Sulfoxide                        | 18.4 | 16.4 | 10.2 | CS(C)=O                                      | 1 |
| 70 | Diocetyl Adipate                          | 16.7 | 2    | 5.1  | CCCCCCCCCOC(=O)CCCCC(=O)OC<br>CCCCCCC        | 1 |
| 71 | Diocetyl Phthalate                        | 16.6 | 7    | 3.1  | CCCCC(CC)COC(=O)c1ccccc1C(=O)<br>OCC(CC)CCCC | 1 |

|     |                                         |      |      |      |                           |   |
|-----|-----------------------------------------|------|------|------|---------------------------|---|
| 72  | Dipropyl Amine                          | 15.3 | 1.4  | 4.1  | CCCNCCC                   | 1 |
| 73  | Dipropylene Glycol                      | 16.5 | 10.6 | 17.7 | OCCCOCCCO                 | 1 |
| 74  | Dipropylene Glycol Methyl Ether         | 15.5 | 5.7  | 11.2 | COCCCOCCCO                | 1 |
| 75  | Epichlorohydrin                         | 18.9 | 7.6  | 6.6  | ClCC1CO1                  | 1 |
| 76  | Ethanol                                 | 15.8 | 8.8  | 19.4 | CCO                       | 1 |
| 77  | Ethanolamine                            | 17   | 15.5 | 21.2 | NCCO                      | 1 |
| 78  | Ethyl Acetate                           | 15.8 | 5.3  | 7.2  | CCOC(C)=O                 | 1 |
| 79  | Ethyl Acrylate                          | 15.5 | 7.1  | 5.5  | C=CC(=O)OCC               | 1 |
| 80  | Ethyl Benzene                           | 17.8 | 0.6  | 1.4  | CCc1ccccc1                | 1 |
| 81  | Ethyl Lactate                           | 16   | 7.6  | 12.5 | CCOC(=O)C(C)O             | 1 |
| 82  | Ethylene Carbonate                      | 19.4 | 21.7 | 5.1  | O=C1OCCO1                 | 1 |
| 83  | Ethylene Cyanohydrin                    | 17.2 | 18.8 | 17.6 | N#CCCCO                   | 1 |
| 84  | Ethylene Dichloride                     | 19   | 7.4  | 4.1  | ClCCCl                    | 1 |
| 85  | Ethylene Glycol                         | 17   | 11   | 26   | OCCO                      | 1 |
| 86  | Ethylene Glycol Butyl Ethyl Ether       | 15.3 | 4.9  | 4.6  | CCCCOCCOCC                | 1 |
| 87  | Ethylene Glycol Di-t-Butyl Ether        | 14.7 | 4.1  | 8.2  | CC(C)(C)OCCOC(C)(C)C      | 1 |
| 88  | Ethylene Glycol Methyl t-Butyl Ether    | 15.3 | 5.1  | 8.2  | COCCOC(C)(C)C             | 1 |
| 89  | Ethylene Glycol Mono t-Butyl Ether      | 15.3 | 6.1  | 10.8 | CC(C)(C)OCCO              | 1 |
| 90  | Ethylene Glycol Monobutyl Ether         | 16   | 5.1  | 12.3 | CCCCOCCO                  | 1 |
| 91  | Ethylene Glycol Monoethyl Ether         | 16.2 | 9.2  | 14.3 | CCOCCO                    | 1 |
| 92  | Ethylene Glycol Monoethyl Ether Acetate | 15.9 | 4.7  | 10.6 | CCOCCOC(C)=O              | 1 |
| 93  | Ethylene Glycol Monoisobutyl Ether      | 15.2 | 4.9  | 9.6  | CC(C)COCCO                | 1 |
| 94  | Ethylene Glycol Monomethyl Ether        | 16.2 | 9.2  | 16.4 | COCCO                     | 1 |
| 95  | Formamide                               | 17.2 | 26.2 | 19   | NC=O                      | 1 |
| 96  | Formic Acid                             | 14.3 | 11.9 | 16.6 | O=CO                      | 1 |
| 97  | Furan                                   | 17.8 | 1.8  | 5.3  | c1ccoc1                   | 1 |
| 98  | Furfuryl Alcohol                        | 17.4 | 7.6  | 15.1 | OCc1ccoc1                 | 1 |
| 99  | gamma-Butyrolactone                     | 19   | 16.6 | 7.4  | O=C1CCCCO1                | 1 |
| 100 | Glycerol                                | 17.4 | 12.1 | 29.3 | OCC(O)CO                  | 1 |
| 101 | Glycidyl Methacrylate                   | 16.3 | 8.5  | 5.7  | C=C(C)C(=O)OCC1CO1        | 1 |
| 102 | Hexafluoro Isopropanol                  | 17.2 | 4.5  | 14.7 | OC(C(F)(F)F)C(F)(F)F      | 1 |
| 103 | Hexafluorohexanol                       | 15.1 | 4.4  | 9.9  | CCCC(F)(F)C(F)(F)C(O)(F)F | 1 |
| 104 | Hexamethylphosphoramide                 | 18.5 | 8.6  | 11.3 | CN(C)P(=O)(N(C)C)N(C)C    | 1 |
| 105 | Hexane                                  | 14.9 | 0    | 0    | CCCCCC                    | 1 |
| 106 | Hydroxyethyl Acrylate                   | 16   | 13.2 | 13.4 | C=CC(=O)OCCO              | 1 |
| 107 | Isoamyl Acetate                         | 15.3 | 3.1  | 7    | CC(=O)OCCCC(C)C           | 1 |
| 108 | Isobutyl Acetate                        | 15.1 | 3.7  | 6.3  | CC(=O)OCC(C)C             | 1 |
| 109 | Isobutyl Alcohol                        | 15.1 | 5.7  | 15.9 | CC(C)CO                   | 1 |
| 110 | Isobutyl Isobutyrate                    | 15.1 | 2.9  | 5.9  | CC(C)COC(=O)C(C)C         | 1 |
| 111 | Isophorone                              | 16.6 | 8.2  | 7.4  | CC1=CC(=O)CC(C)(C)C1      | 1 |

|     |                                   |      |      |      |                                       |   |
|-----|-----------------------------------|------|------|------|---------------------------------------|---|
| 112 | Lauryl Methacrylate               | 14.4 | 2.2  | 5.1  | C=C(C)C(=O)OCCCCCCCCCCCC              | 1 |
| 113 | m-Cresol                          | 18   | 5.1  | 12.9 | Cc1cccc(O)c1                          | 1 |
| 114 | Mesityl Oxide                     | 16.4 | 6.1  | 6.1  | CC(=O)C=C(C)C                         | 1 |
| 115 | Methacrylic Acid                  | 15.8 | 2.8  | 10.2 | C=C(C)C(=O)O                          | 1 |
| 116 | Methacrylonitrile                 | 15.8 | 15.1 | 5.4  | C=C(C)C#N                             | 1 |
| 117 | Methanol                          | 15.1 | 12.3 | 22.3 | CO                                    | 1 |
| 118 | Methyl Acetate                    | 15.5 | 7.2  | 7.6  | COC(C)=O                              | 1 |
| 119 | Methyl Acrylate                   | 15.3 | 6.7  | 9.4  | C=CC(=O)OC                            | 1 |
| 120 | Methyl Ethyl Ketone               | 16   | 9    | 5.1  | CCC(C)=O                              | 1 |
| 121 | Methyl Ethyl Ketoxime             | 14.7 | 4.9  | 7.8  | CCC(C)=NO                             | 1 |
| 122 | Methyl Isoamyl Ketone             | 16   | 5.7  | 4.1  | CC(=O)CCC(C)C                         | 1 |
| 123 | Methyl Isobutyl Carbinol          | 15.4 | 3.3  | 12.3 | CC(C)CC(C)O                           | 1 |
| 124 | Methyl Isobutyl Ketone            | 15.3 | 6.1  | 4.1  | CC(=O)CC(C)C                          | 1 |
| 125 | Methyl Methacrylate               | 15.8 | 6.5  | 5.4  | C=C(C)C(=O)OC                         | 1 |
| 126 | Methylene Dichloride              | 18.2 | 6.3  | 6.1  | ClCCl                                 | 1 |
| 127 | Morpholine                        | 18.8 | 4.9  | 9.2  | C1COCCN1                              | 1 |
| 128 | N,N-Dimethyl Acetamide            | 16.8 | 11.5 | 10.2 | CC(=O)N(C)C                           | 1 |
| 129 | n-Butyl Acetate                   | 15.8 | 3.7  | 6.3  | CCCCOC(C)=O                           | 1 |
| 130 | n-Butyl Acrylate                  | 15.6 | 6.2  | 4.9  | C=CC(=O)OCCCC                         | 1 |
| 131 | Nitrobenzene                      | 20   | 8.6  | 4.1  | O=[N+]([O-])c1ccccc1                  | 1 |
| 132 | Nitroethane                       | 16   | 15.5 | 4.5  | CC[N+]([O-])=O                        | 1 |
| 133 | Nitromethane                      | 15.8 | 18.8 | 5.1  | C[N+]([O-])=O                         | 1 |
| 134 | N-Methyl-2-Pyrrolidone            | 18   | 12.3 | 7.2  | CN1CCCC1=O                            | 1 |
| 135 | o-Dichlorobenzene                 | 19.2 | 6.3  | 3.3  | Clc1ccccc1Cl                          | 1 |
| 136 | Pentoxone                         | 15.3 | 6    | 5.9  | COC(C)(C)CC(C)=O                      | 1 |
| 137 | Propylene Carbonate               | 20   | 18   | 4.1  | CC1COC(=O)O1                          | 1 |
| 138 | Propylene Glycol                  | 16.8 | 9.4  | 23.3 | CC(O)CO                               | 1 |
| 139 | Propylene Glycol Monomethyl Ether | 15.6 | 6.3  | 11.6 | COCC(C)O                              | 1 |
| 140 | p-Xylene                          | 17.6 | 1    | 3.1  | Cc1ccc(C)cc1                          | 1 |
| 141 | Pyridine                          | 19   | 8.8  | 5.9  | c1ccncc1                              | 1 |
| 142 | Styrene                           | 18.6 | 1    | 4.1  | C=Cc1ccccc1                           | 1 |
| 143 | t-Butyl Alcohol                   | 15.2 | 5.1  | 14.7 | CC(C)(C)O                             | 1 |
| 144 | Tetrahydrofuran                   | 16.8 | 5.7  | 8    | C1CCOC1                               | 1 |
| 145 | Tetrahydrofurfuryl Alcohol        | 17.8 | 8.2  | 10.2 | OCC1CCCO1                             | 1 |
| 146 | Tetrahydronaphthalene             | 19.6 | 2    | 2.9  | c1ccc2c(c1)CCCC2                      | 1 |
| 147 | Tetramethylurea                   | 16.7 | 8.2  | 11   | CN(C)C(=O)N(C)C                       | 1 |
| 148 | Toluene                           | 18   | 1.4  | 2    | Cc1ccccc1                             | 1 |
| 149 | Trichloroethylene                 | 18   | 3.1  | 5.3  | ClC=C(Cl)Cl                           | 1 |
| 150 | Tricresyl Phosphate               | 19   | 12.3 | 4.5  | Cc1ccccc1OP(=O)(Oc1ccccc1C)Oc1ccccc1C | 1 |
| 151 | Triethylamine                     | 17.8 | 0.4  | 1    | CCN(CC)CC                             | 1 |
| 152 | Triethylphosphate                 | 16.7 | 11.4 | 9.2  | CCOP(=O)(OCC)OCC                      | 1 |
| 153 | Trimethylphosphate                | 16.7 | 15.9 | 10.2 | COP(=O)(OC)OC                         | 1 |
| 154 | Triocetyl Phosphate               | 16.2 | 5.9  | 4.2  | CCCCCCCCOP(=O)(OCCCCCCCC)OCCCCCCCC    | 1 |

|     |                                      |       |       |       |                                                                                                                                                                                                |    |
|-----|--------------------------------------|-------|-------|-------|------------------------------------------------------------------------------------------------------------------------------------------------------------------------------------------------|----|
| 155 | Tripropylene Glycol Monomethyl Ether | 15.3  | 5.5   | 10.4  | COCC(C)OCC(C)OCC(C)O                                                                                                                                                                           | 1  |
| 156 | Urea                                 | 20.9  | 18.7  | 26.4  | NC(N)=O                                                                                                                                                                                        | 1  |
| 157 | Benzoic Acid                         | 17.63 | 10.1  | 10.74 | O=C(O)c1ccccc1                                                                                                                                                                                 | 2  |
| 158 | Ibuprofen                            | 16.44 | 6.39  | 8.89  | CC(C)Cc1ccc(C(C)C(=O)O)cc1                                                                                                                                                                     | 2  |
| 159 | Salicylic Acid                       | 16.55 | 12.43 | 14.62 | O=C(O)c1ccccc1O                                                                                                                                                                                | 3  |
| 160 | Piroxicam                            | 16.8  | 21.4  | 6.6   | CN1C=C(O)Nc2ccccc2C(=O)c2ccccc2S1(=O)=O                                                                                                                                                        | 4  |
| 161 | Niflumic Acid                        | 16.8  | 12.1  | 11.7  | O=C(O)c1ccccc1Nc1ccccc1C(F)(F)F)c1                                                                                                                                                             | 4  |
| 162 | Phenylbutazone                       | 17.5  | 12.5  | 10.7  | CCCCC1C(=O)N(c2ccccc2)N(c2ccccc2)C1=O                                                                                                                                                          | 5  |
| 163 | Theophylline                         | 16.8  | 11.3  | 13.7  | Cn1c(=O)[nH]c2nc(O)[nH]c2c1=O                                                                                                                                                                  | 5  |
| 164 | Caffeine                             | 17.3  | 13.7  | 13.4  | Cn1c(=O)c2c(ncn2C)n(C)c1=O                                                                                                                                                                     | 5  |
| 165 | Citric Acid                          | 16.2  | 13.5  | 17.3  | O=C(O)CC(O)(CC(=O)O)C(=O)O                                                                                                                                                                     | 6  |
| 166 | Lorazepam                            | 15.9  | 15.6  | 13.8  | O=C1Nc2ccc(Cl)cc2C(c2ccccc2Cl)=NC1O                                                                                                                                                            | 7  |
| 167 | Oxazepam                             | 15.6  | 16.2  | 13.6  | O=C1Nc2ccc(Cl)cc2C(c2ccccc2)=NC1O                                                                                                                                                              | 7  |
| 168 | Diazepam                             | 15.9  | 13.3  | 8.6   | CN1C(=O)CN=C(c2ccccc2)c2cc(Cl)ccc21                                                                                                                                                            | 7  |
| 169 | Prazepam                             | 15.7  | 12.6  | 6.8   | O=C1CN=C(c2ccccc2)c2cc(Cl)ccc2N1CC1CC1                                                                                                                                                         | 7  |
| 170 | Diclofenac                           | 18.2  | 12.9  | 10.6  | O=C(O)Cc1ccccc1Nc1c(Cl)cccc1Cl                                                                                                                                                                 | 2  |
| 171 | p-Aminobenzoic Acid                  | 17.3  | 14.3  | 14.4  | Nc1ccc(C(=O)O)cc1                                                                                                                                                                              | 2  |
| 172 | Haloperidol                          | 17.2  | 9     | 10.8  | O=C(CCCN1CCC(O)(c2ccc(Cl)cc2)CC1)c1ccc(F)cc1                                                                                                                                                   | 8  |
| 173 | Sucrose                              | 17.1  | 18.5  | 13.1  | OCC1OC(OC2(CO)OC(CO)C(O)C2O)C(O)C(O)C1O                                                                                                                                                        | 9  |
| 174 | Mannitol                             | 16.2  | 24.5  | 14.6  | OC[C@@H](O)[C@@H](O)[C@H](O)[C@H](O)CO                                                                                                                                                         | 9  |
| 175 | Lactose                              | 17.6  | 28.7  | 19    | OCC1OC(OC2C(CO)OC(O)C(O)C2O)C(O)C(O)C1O                                                                                                                                                        | 9  |
| 176 | Meloxicam                            | 19.2  | 13.2  | 5     | Cc1cnc(NC(O)=C2C(=O)c3ccccc3S(=O)(=O)N2C)s1                                                                                                                                                    | 9  |
| 177 | Naphthalene                          | 20.6  | 4     | 1.9   | c1ccc2ccccc2c1                                                                                                                                                                                 | 10 |
| 178 | Naproxen                             | 17.4  | 12.1  | 9.9   | COc1ccc2cc(C(C)C(=O)O)ccc2c1                                                                                                                                                                   | 11 |
| 179 | p-Hydroxybenzoic Acid                | 17    | 14.5  | 13.8  | O=C(O)c1ccc(O)cc1                                                                                                                                                                              | 12 |
| 180 | Pimozide                             | 19.3  | 5.4   | 11.6  | O=c1[nH]c2ccccc2n1C1CCN(CCCC(c2ccc(F)cc2)c2ccc(F)cc2)CC1                                                                                                                                       | 13 |
| 181 | Temazepam                            | 21.9  | 9.8   | 8.2   | CN1C(=O)C(O)N=C(c2ccccc2)c2cc(Cl)ccc21                                                                                                                                                         | 14 |
| 182 | Trimethoprim                         | 14.3  | 12.7  | 11.7  | COc1cc(Cc2cnc(N)nc2N)cc(OC)c1OC                                                                                                                                                                | 15 |
| 183 | Cyclosporine                         | 18.83 | 3.25  | 14.1  | C/C=C/CC(C)C(O)C1C(O)=NC(CC)C(=O)N(C)CC(=O)N(C)C(CC(C)C)C(O)=NC(C(C)C)C(=O)N(C)C(CC(C)C)C(O)=NC(C)C(O)=NC(C)C(=O)N(C)C(CC(C)C)C(=O)N(C)C(CC(C)C)C(=O)N(C)C(C(C)C)C(=O)N1C                      | 16 |
| 184 | Digitoxine                           | 20.73 | 3.69  | 17.61 | C[C@H]1O[C@@H](O)[C@H]2[C@@H](O)C[C@H](O)[C@H]3[C@@H](O)C[C@H](O)[C@H]4CC[C@]5(C)[C@H]6C[C@@H](O)[C@]7(C)[C@@H](C8=CC(=O)OC8)CC[C@]7(O)[C@@H]6CC[C@@H]5C4)O[C@H]3C)O[C@@H]2C)C[C@H](O)[C@@H]1O | 16 |
| 185 | Dicoumarol                           | 26.25 | 5.57  | 17.83 | O=C1OC2C=CC=CC2C(O)=C1Cc1c(O)c2ccccc2oc1=O                                                                                                                                                     | 16 |
| 186 | Erythromycin                         | 18.09 | 3.35  | 15.65 | CC[C@H]1OC(=O)[C@H](C)[C@@H](O)[C@H]2C[C@@](C)(OC)[C@@H](O)[C@H](C)O2)[C@H](C)[C@@H](O)[C@@H]2O[C@H](C)C[C@H](N(C)C)[C@H]2O)[C@](C)(O)C[C@@H](C)C(=O)[C@H](C)[C@@H](O)[C@]1(C)O                | 16 |
| 187 | Quinidine                            | 20.72 | 5.53  | 11.97 | C=C[C@H]1CN2CC[C@H]1C[C@@H]2                                                                                                                                                                   | 16 |

|     |                                |       |      |       |                                                                                                               |    |
|-----|--------------------------------|-------|------|-------|---------------------------------------------------------------------------------------------------------------|----|
| 188 | Chloramphenicol                | 23.06 | 9.5  | 18.68 | <chem>[C@@H](O)c1ccnc2ccc(OC)cc12</chem><br><chem>O=C(N[C@H](CO)[C@H](O)c1ccc([N+](=O)[O-])cc1)C(Cl)Cl</chem> | 16 |
| 189 | Propranolol                    | 19.57 | 3.35 | 11.04 | <chem>C[C@]12C[C@H](O)[C@H]3[C@@H](CCC4=CC(=O)C=C[C@@]43C)[C@@H]1CC[C@]2(O)C(=O)CO</chem>                     | 16 |
| 190 | Tetracycline                   | 24.99 | 8.53 | 22.25 | <chem>CN(C)[C@@H]1C(O)=C(C(N)=O)C(=O)[C@@]2(O)C(O)=C3C(=O)c4c(O)cccc4[C@@](C)(O)[C@H]3C[C@@H]12</chem>        | 16 |
| 191 | 1,2,4-trichlorobenzene         | 20.2  | 4.2  | 3.2   | <chem>Clc1c(Cl)ccc(Cl)c1</chem>                                                                               | 17 |
| 192 | Iodobenzene                    | 19.9  | 5.6  | 4.5   | <chem>Ic1ccccc1</chem>                                                                                        | 17 |
| 193 | Bromobenzene                   | 20.5  | 5.5  | 4.1   | <chem>Br1ccccc1</chem>                                                                                        | 17 |
| 194 | 1-methyl naphthalene           | 20.6  | 0.8  | 4.7   | <chem>c12c(cccc1C)cccc2</chem>                                                                                | 17 |
| 195 | 1,2,3,4-tetramethylbenzene     | 18.8  | 0.5  | 0.5   | <chem>c1(c(c(cc1C)C)C)C</chem>                                                                                | 17 |
| 196 | 1,2,3,5-tetramethylbenzene     | 18.6  | 0.5  | 0.5   | <chem>c1(c(cc(cc1C)C)C)C</chem>                                                                               | 17 |
| 197 | Quinoline                      | 19.8  | 5.6  | 5.7   | <chem>c1(c(cc(cc1C)C)C)C</chem>                                                                               | 17 |
| 198 | 1,2,4-trimethylbenzene         | 18    | 1    | 1     | <chem>c1(c(ccc(c1)C)C)C</chem>                                                                                | 17 |
| 199 | Fluorobenzene                  | 18.7  | 6.1  | 2     | <chem>Fc1ccccc1</chem>                                                                                        | 17 |
| 200 | 1,1,2,2-tetrachloroethane      | 18.8  | 5.1  | 5.3   | <chem>ClC(Cl)C(Cl)Cl</chem>                                                                                   | 17 |
| 201 | Isopropyl benzene              | 18.1  | 1.2  | 1.2   | <chem>C(c1ccccc1)(C)C</chem>                                                                                  | 17 |
| 202 | cis-decahydronaphthalene       | 18.8  | 0    | 0     | <chem>[C@H]12[C@@H](CCCC1)CCCC2</chem>                                                                        | 17 |
| 203 | Benzyl chloride                | 18.8  | 7.1  | 2.6   | <chem>ClCc1ccccc1</chem>                                                                                      | 17 |
| 204 | Tetrachloroethylene            | 18.3  | 5.7  | 0     | <chem>ClC(=C(Cl)Cl)Cl</chem>                                                                                  | 17 |
| 205 | Methylene diiodide             | 17.8  | 3.9  | 5.5   | <chem>ICI</chem>                                                                                              | 17 |
| 206 | Thiophene                      | 18.9  | 2.4  | 7.8   | <chem>s1ccccc1</chem>                                                                                         | 17 |
| 207 | Bromochloromethane             | 17.3  | 5.7  | 3.5   | <chem>BrCCl</chem>                                                                                            | 17 |
| 208 | n-butylbenzene                 | 17.4  | 0.1  | 1.1   | <chem>C(Cc1ccccc1)CC</chem>                                                                                   | 17 |
| 209 | 1,3-dichloro propane           | 18.6  | 8.2  | 3     | <chem>ClCCCCl</chem>                                                                                          | 17 |
| 210 | Tetrahydrothiophene            | 18.9  | 7.5  | 5.8   | <chem>S1CCCC1</chem>                                                                                          | 17 |
| 211 | Ethylene dibromide             | 19.2  | 3.5  | 8.6   | <chem>BrCCBr</chem>                                                                                           | 17 |
| 212 | Dibromomethane                 | 17.8  | 6.4  | 7     | <chem>BrCBr</chem>                                                                                            | 17 |
| 213 | Methyl iodide                  | 17.5  | 7.7  | 5.3   | <chem>IC</chem>                                                                                               | 17 |
| 214 | Cyclopentane                   | 16.4  | 0    | 1.8   | <chem>C1CCCC1</chem>                                                                                          | 17 |
| 215 | 1-bromobutane                  | 16.5  | 6    | 4.5   | <chem>BrCCCC</chem>                                                                                           | 17 |
| 216 | Benzonitrile                   | 17.4  | 9    | 3.3   | <chem>N#Cc1ccccc1</chem>                                                                                      | 17 |
| 217 | n-tetradecane                  | 16.2  | 0    | 0     | <chem>C(CCCCCC)CCCCC</chem>                                                                                   | 17 |
| 218 | Methyl cyclohexane             | 16    | 0    | 1     | <chem>C1(CCCCC1)C</chem>                                                                                      | 17 |
| 219 | Ethyl iodide                   | 17.3  | 7.9  | 7.2   | <chem>ICC</chem>                                                                                              | 17 |
| 220 | Dodecane                       | 16    | 0    | 0     | <chem>C(CCCCCC)CCCCC</chem>                                                                                   | 17 |
| 221 | Ethyl bromide                  | 16.5  | 8.4  | 2.3   | <chem>BrCC</chem>                                                                                             | 17 |
| 222 | 1-bromopropane                 | 16.4  | 7.9  | 4.8   | <chem>BrCCC</chem>                                                                                            | 17 |
| 223 | Propyl chloride                | 16    | 7.8  | 2     | <chem>ClCCC</chem>                                                                                            | 17 |
| 224 | n-butyl amine                  | 16.2  | 4.5  | 8     | <chem>NCCCC</chem>                                                                                            | 17 |
| 225 | Decane                         | 15.7  | 0    | 0     | <chem>C(CCCCC)CCCC</chem>                                                                                     | 17 |
| 226 | Nonane                         | 15.7  | 0    | 0     | <chem>C(CCCC)CCCC</chem>                                                                                      | 17 |
| 227 | Octane                         | 15.5  | 0    | 0     | <chem>C(CCCC)CCC</chem>                                                                                       | 17 |
| 228 | Heptane                        | 15.3  | 0    | 0     | <chem>C(CCC)CCC</chem>                                                                                        | 17 |
| 229 | 1,2,3-trichloropropane         | 17.8  | 12.3 | 3.4   | <chem>ClC(CCl)CCl</chem>                                                                                      | 17 |
| 230 | 1,1,2-trichlorotrifluoroethane | 14.7  | 1.6  | 0     | <chem>ClC(Cl)(F)C(Cl)(F)F</chem>                                                                              | 17 |
| 231 | Pentane                        | 14.5  | 0    | 0     | <chem>C(CC)CC</chem>                                                                                          | 17 |
| 232 | 1-octanol                      | 16    | 5    | 11.9  | <chem>OCCCCCCCC</chem>                                                                                        | 17 |
| 233 | 2-pentanol                     | 15.6  | 6.4  | 13.3  | <chem>O[C@H](CCC)C</chem>                                                                                     | 17 |
| 234 | 1,4-butanediol                 | 16.6  | 15.3 | 21.7  | <chem>OCCCCO</chem>                                                                                           | 17 |
| 235 | 2-chlorotoluene                | 19    | 4.9  | 2.3   | <chem>Clc1c(cccc1)C</chem>                                                                                    | 18 |
| 236 | 3-chlorotoluene                | 18.9  | 3.9  | 2.9   | <chem>Clc1cc(ccc1)C</chem>                                                                                    | 18 |
| 237 | b-pinene                       | 17.1  | 3    | 2.7   | <chem>C1([C@@H]2C[C@H]1C(=C)CC2)(C)C</chem>                                                                   | 18 |
| 238 | a-pinene                       | 17.3  | 2.4  | 3.1   | <chem>C1([C@H]2C[C@H]1C(=CC2)C)(C)C</chem>                                                                    | 18 |
| 239 | limonene                       | 17.2  | 1.8  | 4.3   | <chem>[C@@H]1(CCC(=CC1)C)C(=C)C</chem>                                                                        | 18 |
| 240 | 2-chlorophenol                 | 19    | 5.5  | 13.9  | <chem>Clc1c(O)cccc1</chem>                                                                                    | 18 |

|     |                          |      |      |      |                           |    |
|-----|--------------------------|------|------|------|---------------------------|----|
| 241 | benzyl benzoate          | 20   | 5.1  | 5.2  | O(Cc1ccccc1)C(=O)c1ccccc1 | 18 |
| 242 | 1,12-Dodecanethiol       | 17.3 | 5.7  | 4.1  | CCCCCCCCCCCCCO            | 19 |
| 243 | 1,6-Hexanedithiol        | 17.4 | 7.6  | 6.4  | SCCCCCCS                  | 19 |
| 244 | 1,8-Octanedithiol        | 17.4 | 7.3  | 5.2  | SCCCCCCS                  | 19 |
| 245 | 4-Bromoanisole           | 19.8 | 7.7  | 7    | BrC1ccc(OC)cc1            | 19 |
| 246 | n-methyl-2-pyrrolidinone | 18   | 12.3 | 7.2  | O=C1N(CCC1)C              | 19 |
| 247 | Triethylene glycol (TEG) | 16   | 12.5 | 18.6 | O(CCOCCO)CCO              | 20 |
| 248 | 1,8-diiodooctane (DIO)   | 17.6 | 4.8  | 4.6  | ICCCCCCCI                 | 20 |
| 249 | 1-chloronaphthalene (CN) | 19.9 | 4.9  | 2.5  | Clc1c2c(ccc1)cccc2        | 20 |
| 250 | 2-Methylanisole          | 18.3 | 4.7  | 4.8  | O(c1c(cccc1)C)C           | 21 |
| 251 | 3-Methylcyclohexanone    | 17.5 | 7.7  | 3.9  | O=C1C[C@@H](CCC1)C        | 21 |
| 252 | 2-Methyl Tetrahydrofuran | 16.9 | 5    | 4.3  | O1[C@@H](CCC1)C           | 22 |

## Major categories of descriptors

The descriptors are the languages that scientists use to communicate with machine learning models. Descriptors along the target property are used as input to trained machine models. Our studied materials are organic molecules. The molecular descriptors are suitable for machine learning. Molecular descriptors are thousands in numbers. The major categories are given below:

Autocorrelation descriptors

Basak descriptors

BCUT descriptors

Burden descriptors

Connectivity descriptors

Constitutional descriptors

E-state descriptors

Kappa descriptors

Molecular property descriptors

Quantum chemical descriptors

Topological descriptors

CPSA descriptors

RDF descriptors

Geometrical descriptors

WHIM descriptors

Autocorrelation (2D and 3D) descriptors

Constitutional indices

Ring descriptors

matrix-based descriptors (2D and 3D)

MoRSE descriptors

GETAWAY descriptors

These categories also have sub categories.

**Table S2.**  $R^2$  (test) of various models calculated using fingerprints as input.

| $\delta_D$                    |       | $\delta_P$                    |       | $\delta_H$                    |       |
|-------------------------------|-------|-------------------------------|-------|-------------------------------|-------|
| Model                         | $R^2$ | Model                         | $R^2$ | Model                         | $R^2$ |
| BaggingRegressor              | 0.40  | XGBRegressor                  | 0.40  | AdaBoostRegressor             | 0.52  |
| RandomForestRegressor         | 0.35  | MLPRegressor                  | 0.36  | GradientBoostingRegressor     | 0.48  |
| LarsCV                        | 0.35  | GradientBoostingRegressor     | 0.34  | RandomForestRegressor         | 0.46  |
| LassoLarsIC                   | 0.34  | RandomForestRegressor         | 0.33  | XGBRegressor                  | 0.45  |
| HistGradientBoostingRegressor | 0.31  | AdaBoostRegressor             | 0.28  | Lasso                         | 0.4   |
| LGBMRegressor                 | 0.31  | LGBMRegressor                 | 0.22  | BaggingRegressor              | 0.34  |
| LassoLarsCV                   | 0.28  | HistGradientBoostingRegressor | 0.22  | LGBMRegressor                 | 0.34  |
| GradientBoostingRegressor     | 0.28  | BaggingRegressor              | 0.22  | HistGradientBoostingRegressor | 0.34  |
| AdaBoostRegressor             | 0.26  | PoissonRegressor              | 0.21  | ExtraTreeRegressor            | 0.33  |
| ElasticNetCV                  | 0.25  | ExtraTreesRegressor           | 0.19  | ExtraTreesRegressor           | 0.31  |
| LassoCV                       | 0.24  | RidgeCV                       | 0.17  | SVR                           | 0.29  |
| GammaRegressor                | 0.24  | BayesianRidge                 | 0.17  | NuSVR                         | 0.29  |
| KNeighborsRegressor           | 0.23  | ExtraTreeRegressor            | 0.11  | KNeighborsRegressor           | 0.23  |
| GeneralizedLinearRegressor    | 0.23  | DecisionTreeRegressor         | 0.09  | ElasticNet                    | 0.21  |
| TweedieRegressor              | 0.23  | Ridge                         | 0     | LassoLarsIC                   | 0.2   |
| OrthogonalMatchingPursuitCV   | 0.23  | ElasticNetCV                  | 0     | DecisionTreeRegressor         | 0.19  |
| NuSVR                         | 0.19  | LassoCV                       | 0     | MLPRegressor                  | 0.18  |
| SVR                           | 0.19  | GeneralizedLinearRegressor    | 0     | GeneralizedLinearRegressor    | 0.17  |
| XGBRegressor                  | 0.13  | TweedieRegressor              | 0     | TweedieRegressor              | 0.17  |
| ExtraTreeRegressor            | 0.1   | PassiveAggressiveRegressor    | 0     | LarsCV                        | 0.15  |
| BayesianRidge                 | 0.05  | KNeighborsRegressor           | 0     | ElasticNetCV                  | 0.15  |
| ExtraTreesRegressor           | 0.05  | LassoLarsCV                   | 0     | LassoLarsCV                   | 0.08  |
| ElasticNet                    | 0     | LassoLarsIC                   | 0     | DummyRegressor                | 0.08  |
| PoissonRegressor              | 0     | LinearSVR                     | 0     | LassoLars                     | 0.06  |
| RidgeCV                       | 0     | LarsCV                        | 0     | LassoCV                       | 0.05  |
| DecisionTreeRegressor         | 0     | ElasticNet                    | 0     | OrthogonalMatchingPursuitCV   | 0.05  |
| OrthogonalMatchingPursuit     | 0     | SVR                           | 0     | BayesianRidge                 | 0.05  |
| PassiveAggressiveRegressor    | 0     | NuSVR                         | 0     | OrthogonalMatchingPursuit     | 0.03  |
| Ridge                         | 0     | HuberRegressor                | 0     | SGDRegressor                  | 0.01  |
| Lasso                         | 0     | OrthogonalMatchingPursuit     | 0     | RidgeCV                       | 0     |
| DummyRegressor                | 0     | Lasso                         | 0     | PoissonRegressor              | 0     |
| LassoLars                     | 0     | OrthogonalMatchingPursuitCV   | 0     | LinearSVR                     | 0     |
| LinearSVR                     | 0     | DummyRegressor                | 0     | Ridge                         | 0     |
| HuberRegressor                | 0     | LassoLars                     | 0     | HuberRegressor                | 0     |
| MLPRegressor                  | 0     | KernelRidge                   | 0     | PassiveAggressiveRegressor    | 0     |
| GaussianProcessRegressor      | 0     | GaussianProcessRegressor      | 0     | GaussianProcessRegressor      | 0     |
| KernelRidge                   | 0     | SGDRegressor                  | 0     | KernelRidge                   | 0     |
| SGDRegressor                  | 0     | LinearRegression              | 0     | LinearRegression              | 0     |
| RANSACRegressor               | 0     | TransformedTargetRegressor    | 0     | TransformedTargetRegressor    | 0     |
| TransformedTargetRegressor    | 0     | RANSACRegressor               | 0     | RANSACRegressor               | 0     |
| LinearRegression              | 0     | Lars                          | 0     | Lars                          | 0     |
| Lars                          | 0     |                               |       |                               |       |

Note: GammaRegressor is failed to execute for the prediction of  $\delta_P$  and  $\delta_H$ .

**Table S3.** Hansen solubility parameters for 30 small molecule donors (SMDs)

| No. | SMD | $\delta_D$ | $\delta_P$ | $\delta_H$ |
|-----|-----|------------|------------|------------|
|-----|-----|------------|------------|------------|



|    |                               |       |      |      |
|----|-------------------------------|-------|------|------|
| 1  | DMPH (DPP-Py) <sub>2</sub>    | 20.98 | 9.97 | 5.24 |
| 2  | DFPh(DPP-Py) <sub>2</sub>     | 21.56 | 8.57 | 5.63 |
| 3  | CP3                           | 21.63 | 9.99 | 10.2 |
| 4  | CP4                           | 18.38 | 9.5  | 2.75 |
| 5  | RTh-BSe-ThR                   | 17.93 | 9.72 | 6.67 |
| 6  | SM1                           | 21.19 | 10.5 | 4.89 |
| 7  | SM2                           | 20.98 | 10.7 | 4.89 |
| 8  | BDT-TITRh                     | 18.29 | 9.81 | 4.2  |
| 9  | BDT-TI <sub>2</sub> TRh       | 18.29 | 9.81 | 4.2  |
| 10 | DTTFB(PyDPP-T) <sub>2</sub>   | 20.98 | 13.9 | 4.93 |
| 11 | DTTFB(TDPP-T) <sub>2</sub>    | 17.04 | 13.9 | 5.68 |
| 12 | DTTFB(IID-T) <sub>2</sub>     | 20.98 | 10.3 | 6.08 |
| 13 | An(DTDPPA) <sub>2</sub>       | 17.04 | 10.5 | 6.51 |
| 14 | 2D-NDT(TPD) <sub>2</sub>      | 17.04 | 10.5 | 6.27 |
| 15 | 2D-NDT(Ester) <sub>2</sub>    | 17.04 | 10.5 | 6.51 |
| 16 | 2D-NDT(Amide) <sub>2</sub>    | 17.04 | 10.5 | 9.89 |
| 17 | CP1                           | 20.34 | 10.7 | 4.93 |
| 18 | CP2                           | 20.98 | 9.97 | 5.17 |
| 19 | ZnPTDPP                       | 21.24 | 10.8 | 6.89 |
| 20 | ZnPTDPPCN                     | 21.56 | 10.8 | 6.33 |
| 21 | ZnPTDPPPO                     | 21.56 | 10.8 | 6.89 |
| 22 | BTI(2T-DCV-Hex) <sub>3</sub>  | 20.34 | 8.7  | 5.75 |
| 23 | BTI(2T-CNA-EHex) <sub>3</sub> | 20.34 | 10.5 | 5.24 |
| 24 | N(Ph-2T-DCV-Hex) <sub>3</sub> | 17.04 | 8.7  | 5.51 |
| 25 | flu(3TRD) <sub>2</sub>        | 18.16 | 9.81 | 4.2  |
| 26 | flu(3TCN) <sub>2</sub>        | 17.04 | 8.17 | 5.31 |
| 27 | flu(3TIN) <sub>2</sub>        | 20.34 | 8.45 | 4.1  |
| 28 | DR3TSBDT                      | 18.29 | 9.81 | 4.92 |
| 29 | D(CATBTzT)BDT                 | 16.47 | 10   | 8.34 |
| 30 | DCAO3TBDT                     | 18.13 | 10.8 | 6.41 |

## References

1. C. Hansen, *Hansen Solubility Parameters.*, CRC Press, Boca Raton, 2007.
2. P. Bustamante, M. A. Peña and J. Barra, *Int. J. Pharm.*, 2000, **194**, 117-124.
3. J. Barra, M.-A. Peña and P. Bustamante, *European Journal of Pharmaceutical Sciences*, 2000, **10**, 153-161.
4. P. Bustamante, M. A. Peña and J. Barra, *Int. J. Pharm.*, 1998, **174**, 141-150.
5. C. Rey-Mermet, P. Ruelle, H. Nam-Trân, M. Buchmann and U. W. Kesselring, *Pharm. Res.*, 1991, **8**, 636-642.
6. J. BARRA, F. LESCURE, E. DOELKER and P. BUSTAMANTE, *J. Pharm. Pharmacol.*, 1997, **49**, 644-651.

7. S. Verheyen, P. Augustijns, R. Kinget and G. Van den Mooter, *Int. J. Pharm.*, 2001, **228**, 199-207.
8. C. V. S. Subrahmanyam and S. Suresh, *European Journal of Pharmaceutics and Biopharmaceutics*, 1999, **47**, 289-294.
9. M. A. Pena, Y. Daali, J. Barra and P. Bustamante, *CHEMICAL & PHARMACEUTICAL BULLETIN*, 2000, **48**, 179-183.
10. A. Martin, P. L. Wu, A. Adjei, A. Beerbower and J. M. Prausnitz, *J. Pharm. Sci.*, 1981, **70**, 1260-1264.
11. P. Bustamante, M. A. Peña and J. Barra, *J. Pharm. Pharmacol.*, 1998, **50**, 975-982.
12. A. Martin, P. L. Wu and A. Beerbower, *J. Pharm. Sci.*, 1984, **73**, 188-194.
13. J. Thimmasetty, C. V. S. Subrahmanyam, P. R. Sathesh Babu, M. A. Maulik and B. A. Viswanath, *J. Solution Chem.*, 2008, **37**, 1365-1378.
14. P. J. Richardson, D. F. McCafferty and A. D. Woolfson, *Int. J. Pharm.*, 1992, **78**, 189-198.
15. C. V. S. Subrahmanyam, K. R. Prakash and P. G. Rao, *Pharmaceutica Acta Helvetiae*, 1996, **71**, 175-183.
16. D. Obradović, F. Andrić, M. Zlatović and D. Agbaba, *J. Chemom.*, 2018, **32**, e2996.
17. C. M. Hansen and A. L. Smith, *Carbon*, 2004, **42**, 1591-1597.
18. F. Machui, S. Langner, X. Zhu, S. Abbott and C. J. Brabec, *Sol. Energy Mater. Sol. Cells*, 2012, **100**, 138-146.
19. U. Vongsaysy, B. Pavageau, G. Wantz, D. M. Bassani, L. Servant and H. Aziz, *Adv. Energy Mater.*, 2014, **4**, 1300752.
20. K. R. Graham, P. M. Wieruszewski, R. Stalder, M. J. Hartel, J. Mei, F. So and J. R. Reynolds, *Adv. Funct. Mater.*, 2012, **22**, 4801-4813.
21. J. Lee, S. A. Park, S. U. Ryu, D. Chung, T. Park and S. Y. Son, *J. Mater. Chem. A*, 2020, **8**, 21455-21473.
22. I. Jalan, L. Lundin and J. van Stam, *Materials*, 2019, **12**, 3889.
